# Supplementary material for: Climate Stability Index maps, a global high resolution cartography of climate stability from Pliocene to 2100
Source: PubMed Central journal article supplement (PMC8831633; doi:10.1038/s41597-022-01144-5), 2022-02-10

***Data Descriptor: Climate Stability Index maps, a global high resolution cartography of climate stability from Pliocene to 2100***

Sonia Herrando-Moraira, Neus Nualart, Mercè Galbany-Casals, Núria Garcia-Jacas, Haruka Ohashi, Tetsuya Matsui, Alfonso Susanna, Cindy Q. Tang & Jordi López-Pujol

**Table of contents**

|                            |            |
|----------------------------|------------|
| Supplementary Fig. 1 ..... | page 2     |
| Supplementary Fig. 2 ..... | pages 3–25 |

**Supplementary Fig. 1** (a) Map of Climate Stability Index (CSI) values for the past map set [Pliocene (3.3 Ma) to present (1979–2013)], at 2.5 arc-min grid resolution. All pixels have been considered in calculations, despite the fact that in some regions where sea-level dropped during cold periods (T1, T3, T5, T6, T7, T8, T9, see Fig. 1 for time period names) there are values for only one or few time periods, while the remaining time periods have NoData codes. (b) Map showing the areas (in red) affected by some sea-level rising periods (T2, T4, T10, see Fig. 1 for time period names). A raster layer with the affected areas is available at Figshare<sup>1</sup>.

<sup>1</sup> Herrando-Moraira, S. *et al.* Raster\_layers\_R\_scripts.zip. *figshare* <https://doi.org/10.6084/m9.figshare.14672637> (2021).

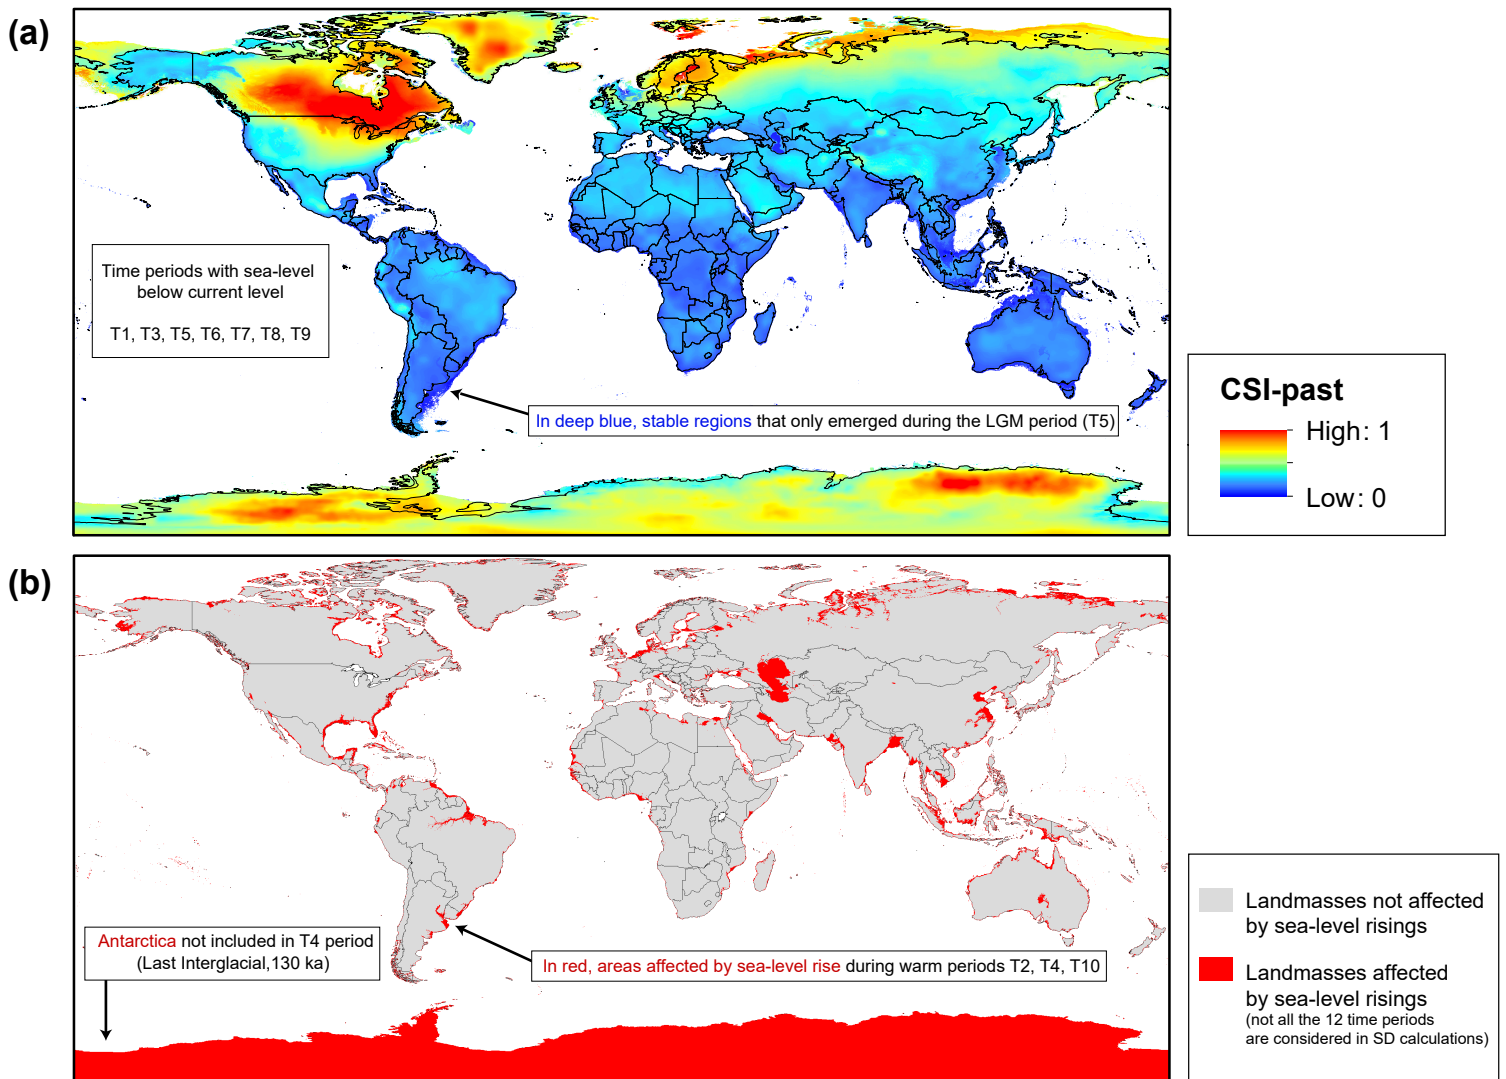

**Supplementary Fig. 2** Correlation values (Pearson's  $r$ ) and correlation scatterplots of Technical validation procedure (see Table 3). The graphics follow the same order as in Table 3.

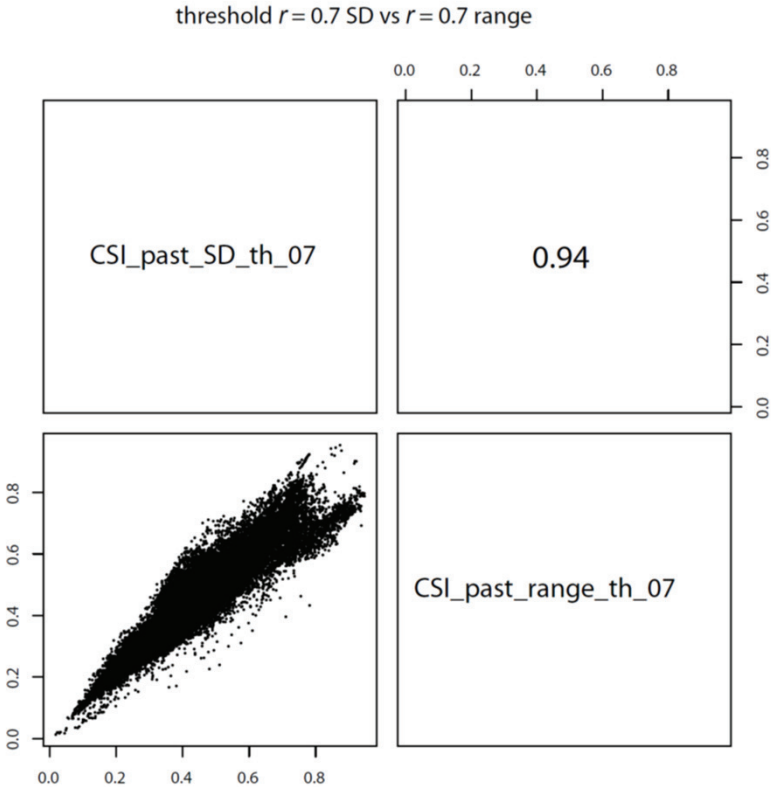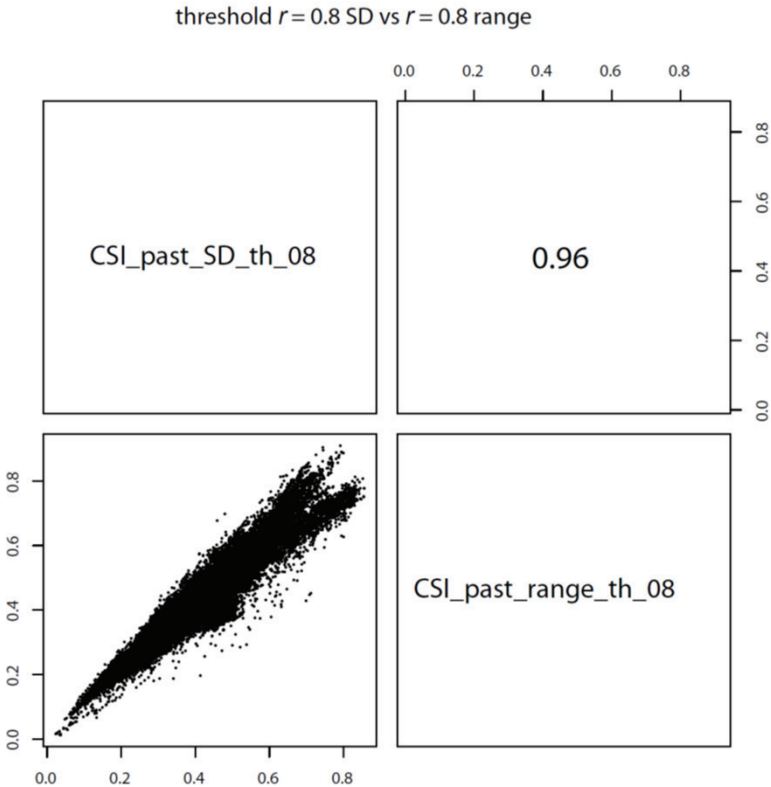

threshold  $r = 0.9$  SD vs  $r = 0.9$  range

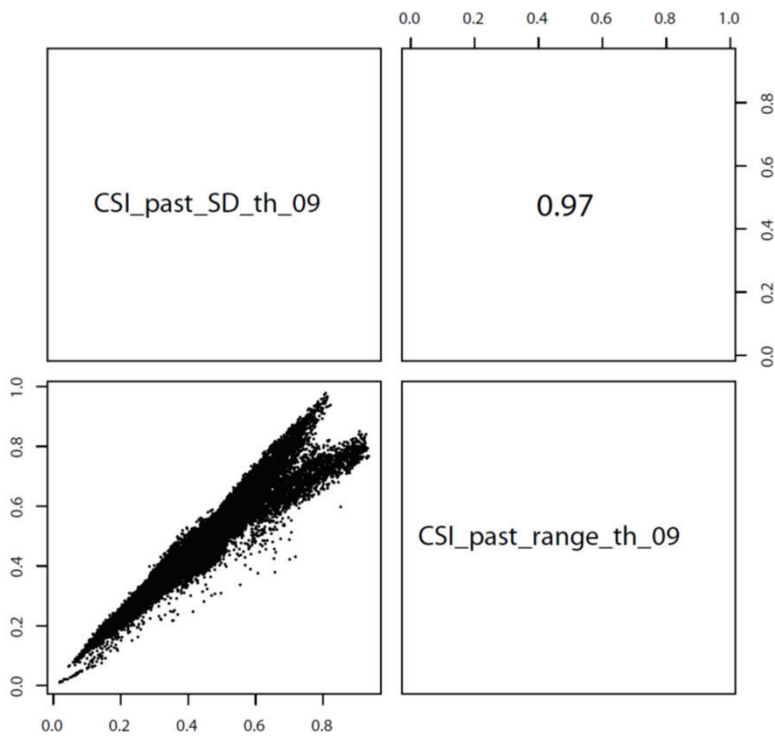

threshold  $r = 0.7$  mean vs  $r = 0.7$  median

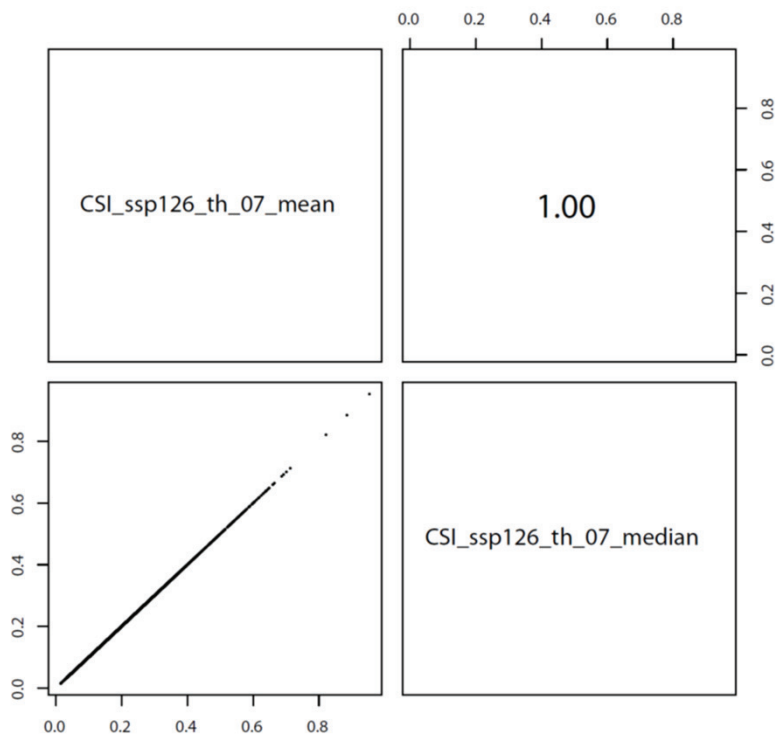

threshold  $r = 0.8$  mean vs  $r = 0.8$  median

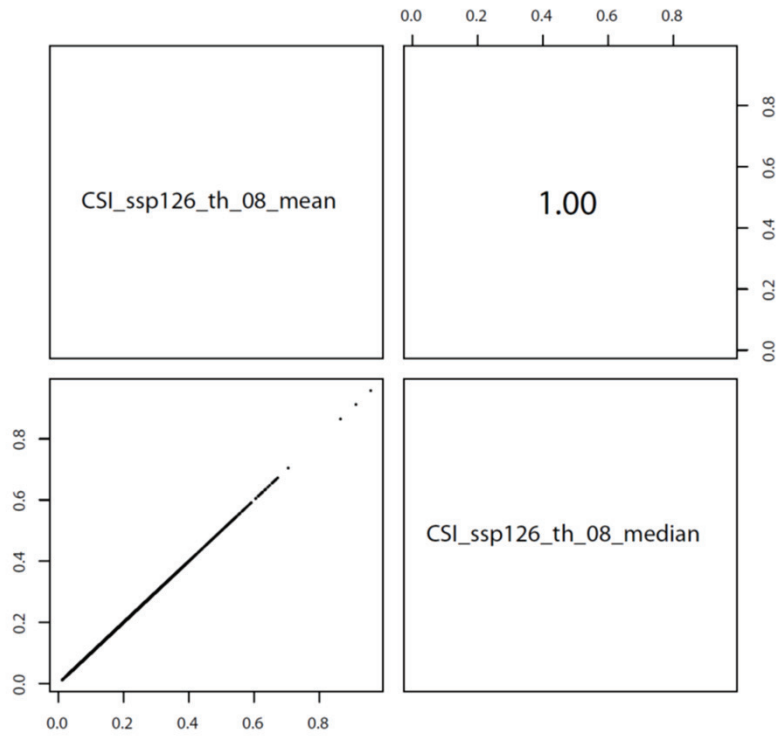

threshold  $r = 0.9$  mean vs  $r = 0.9$  median

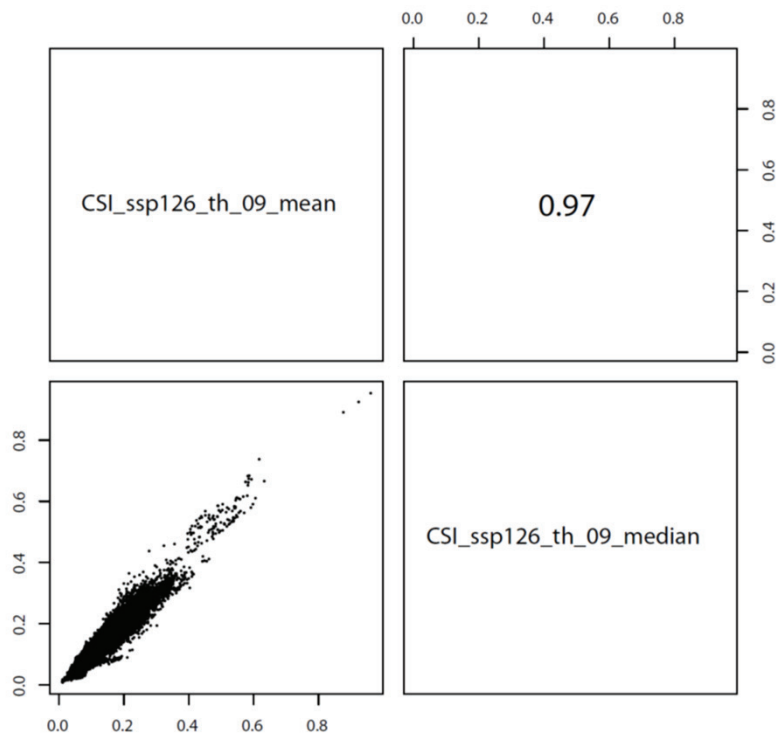

threshold  $r = 0.7$  mean vs  $r = 0.7$  median

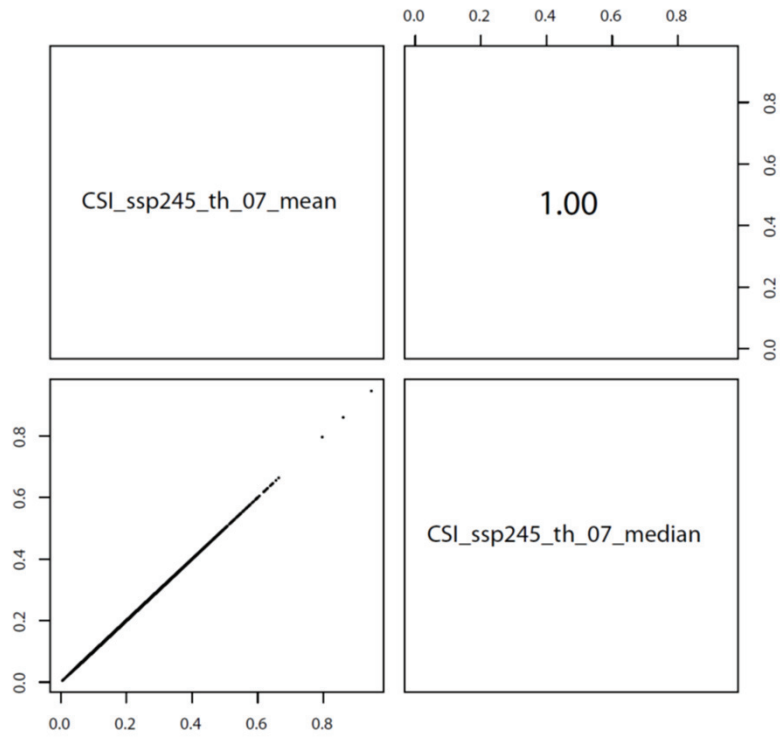

threshold  $r = 0.8$  mean vs  $r = 0.8$  median

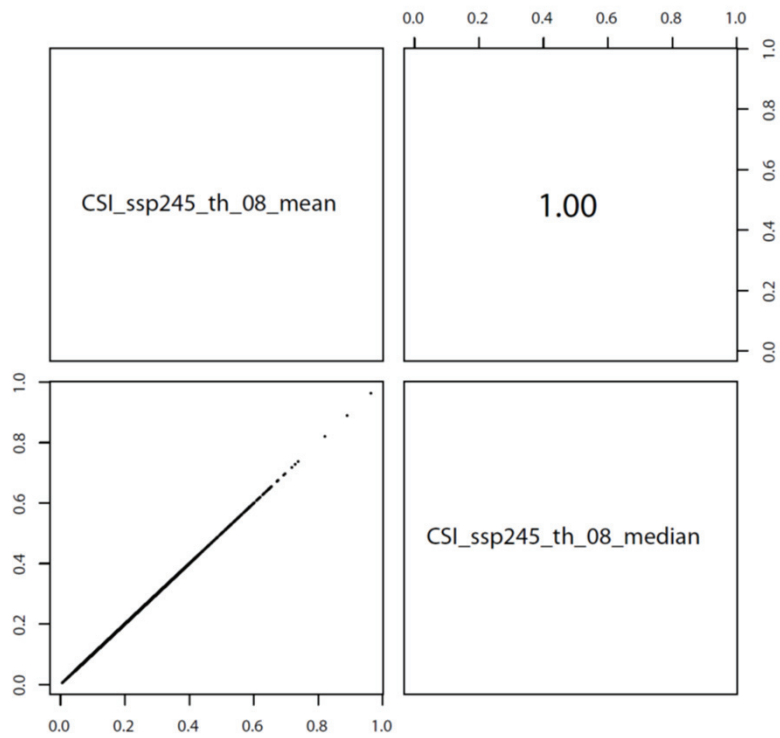

threshold  $r = 0.9$  mean vs  $r = 0.9$  median

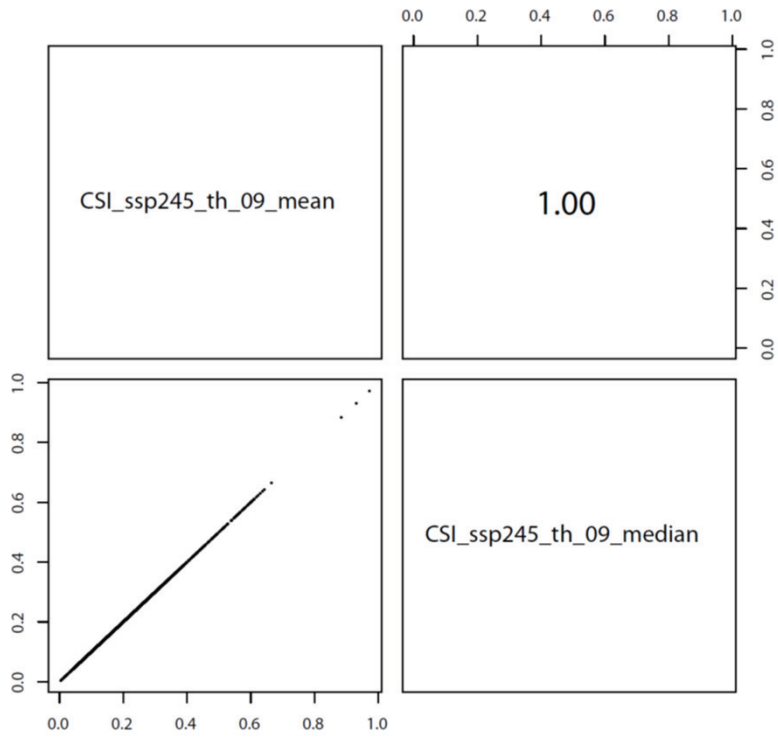

threshold  $r = 0.7$  mean vs  $r = 0.7$  median

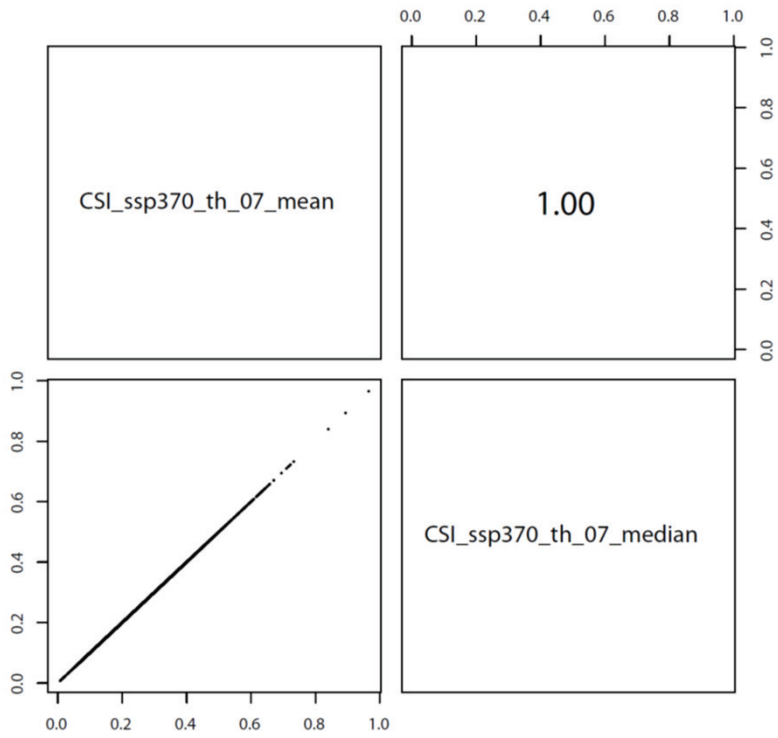

threshold  $r = 0.8$  mean vs  $r = 0.8$  median

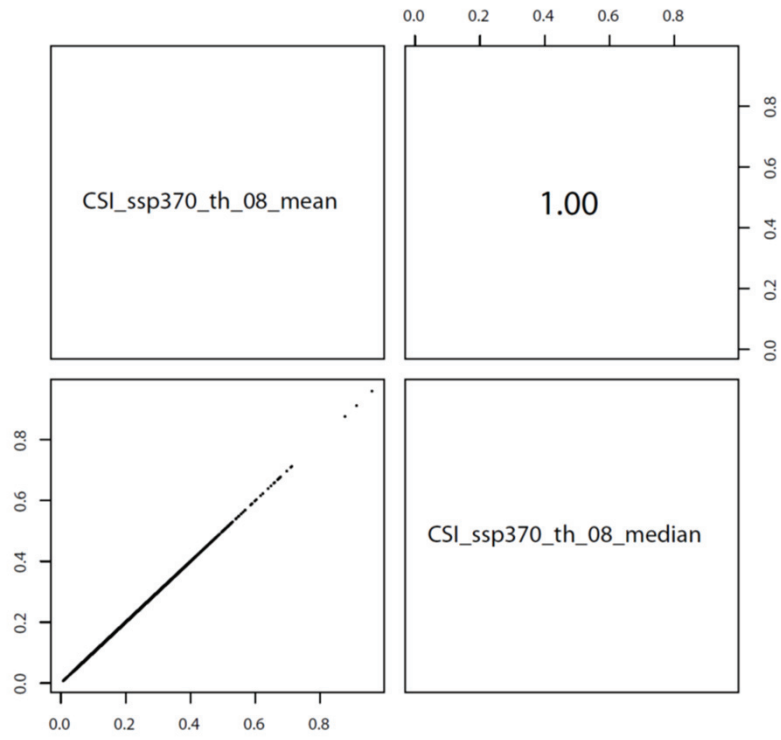

threshold  $r = 0.9$  mean vs  $r = 0.9$  median

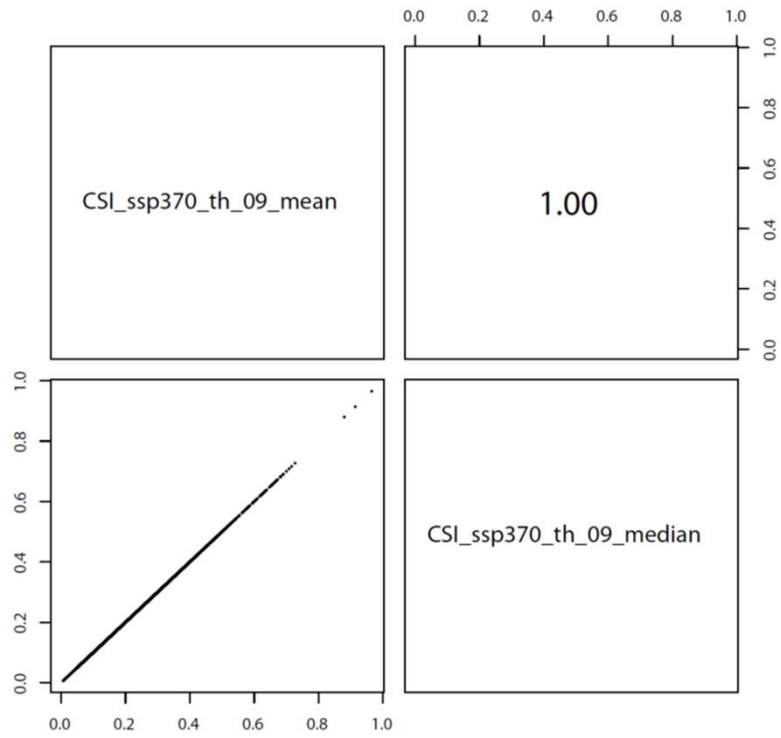



threshold  $r = 0.7$  mean vs  $r = 0.7$  median

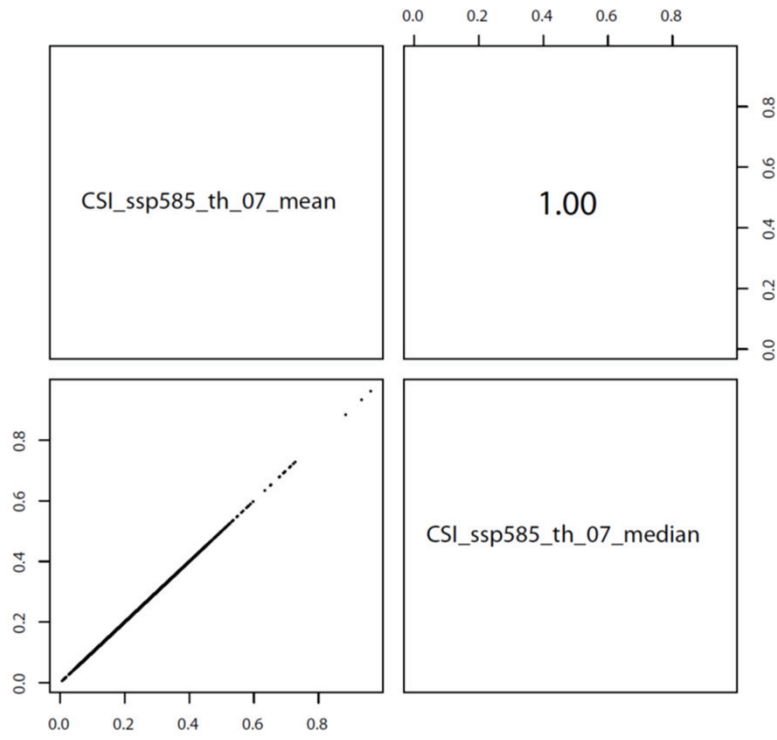

threshold  $r = 0.8$  mean vs  $r = 0.8$  median

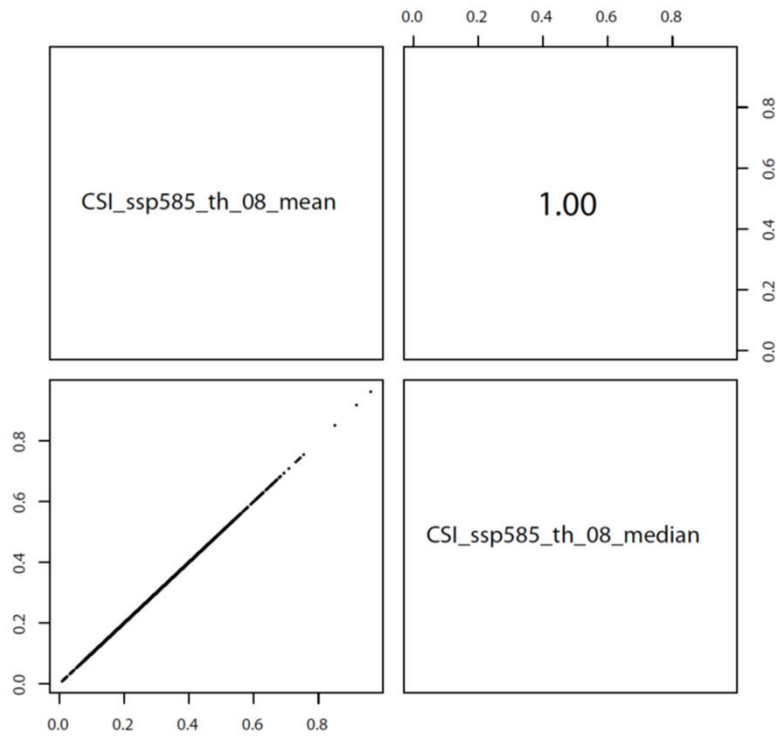

threshold  $r = 0.9$  mean vs  $r = 0.9$  median

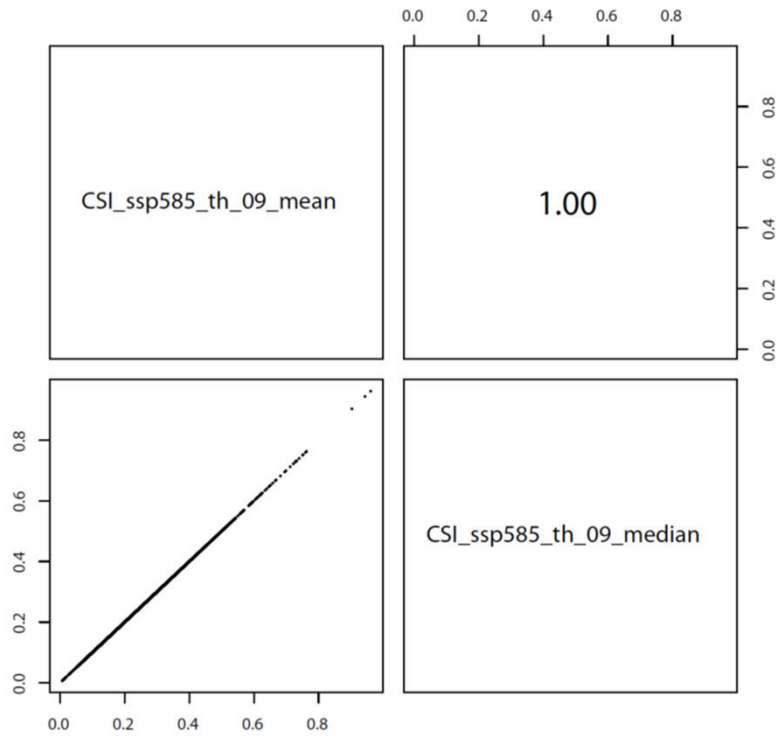

threshold  $r = 0.7$  vs  $r = 0.8$

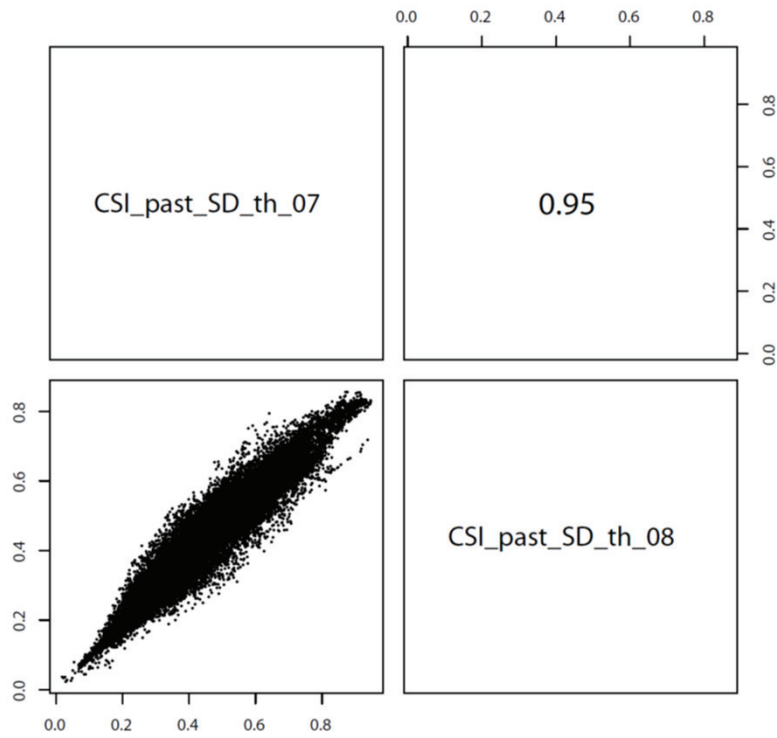

threshold  $r = 0.7$  vs  $r = 0.9$

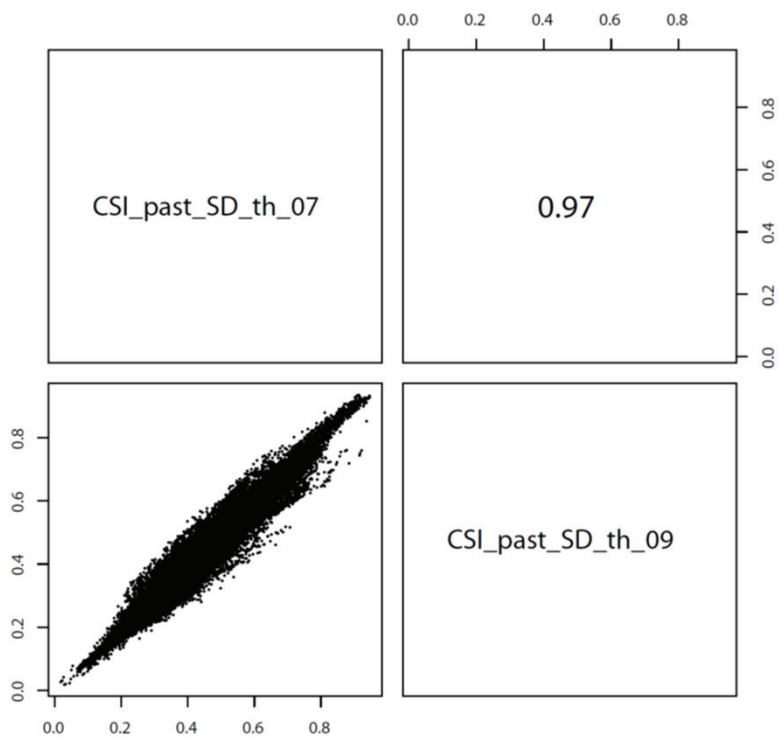

threshold  $r = 0.8$  vs  $r = 0.9$

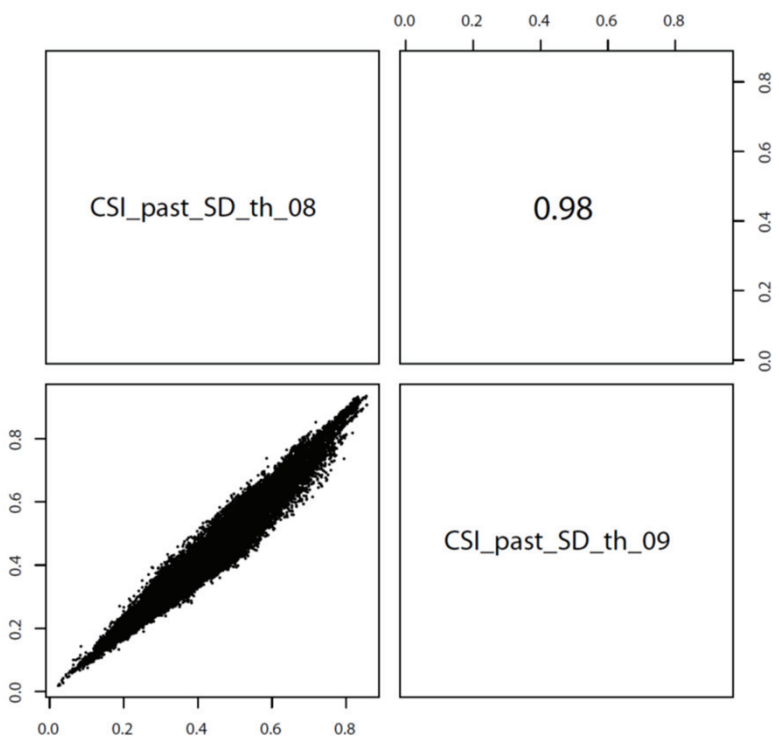

threshold  $r = 0.7$  vs  $r = 0.8$

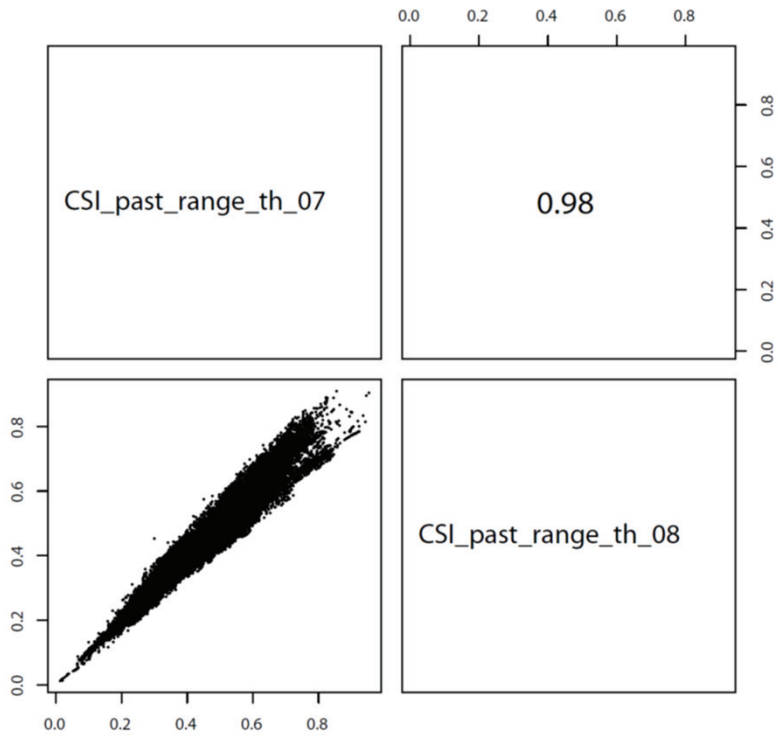

threshold  $r = 0.7$  vs  $r = 0.9$

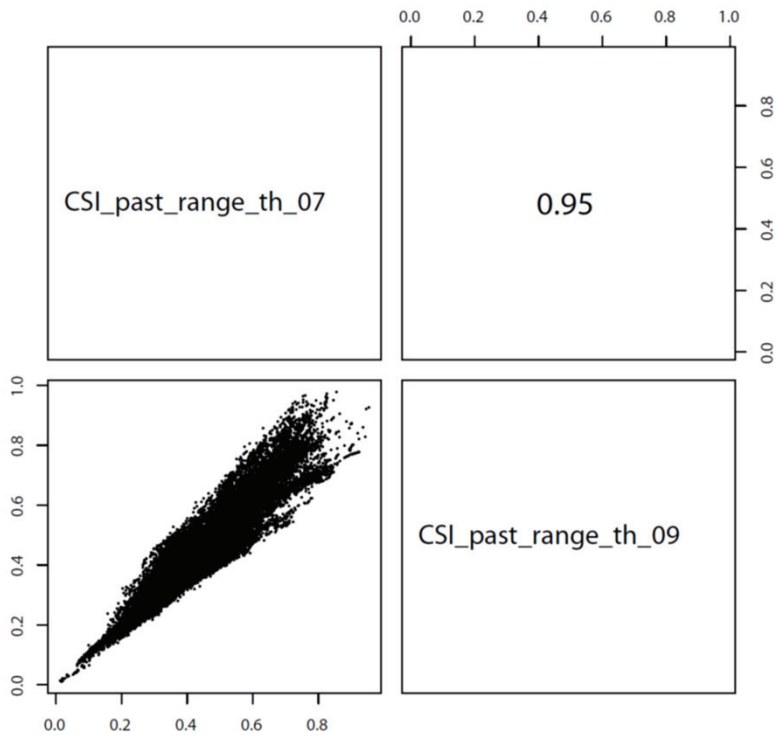

threshold  $r = 0.8$  vs  $r = 0.9$

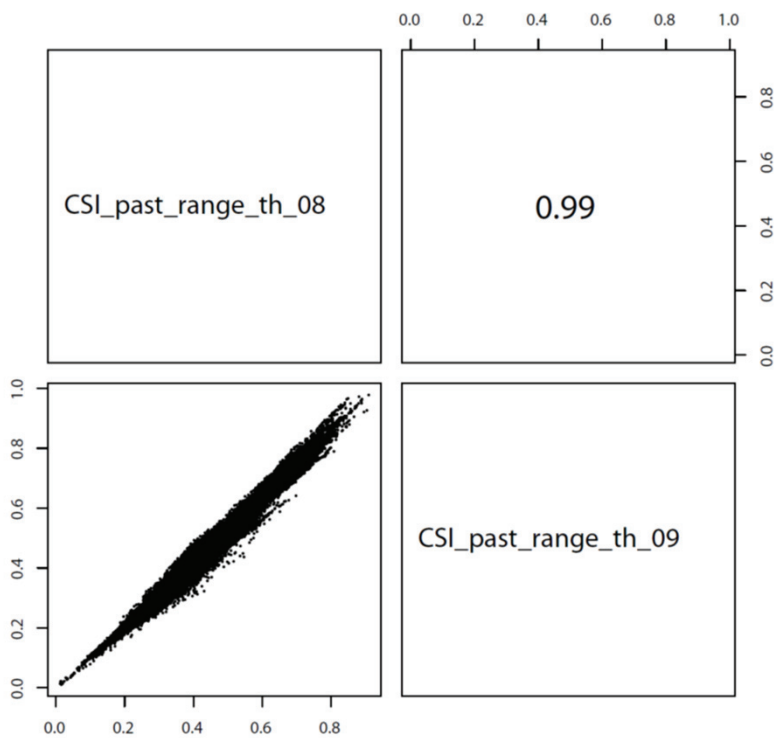

threshold  $r = 0.7$  vs  $r = 0.8$

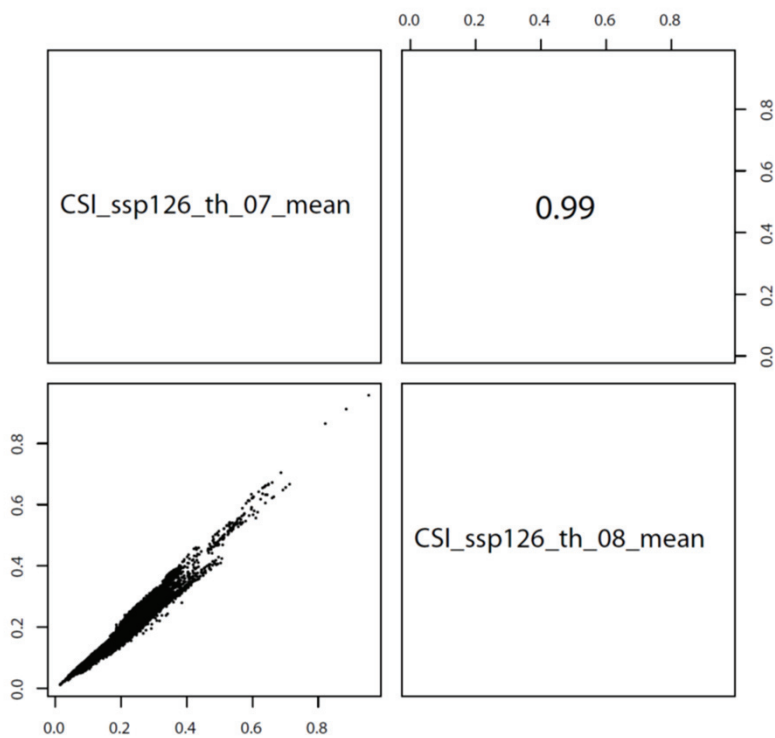

threshold  $r = 0.7$  vs  $r = 0.9$

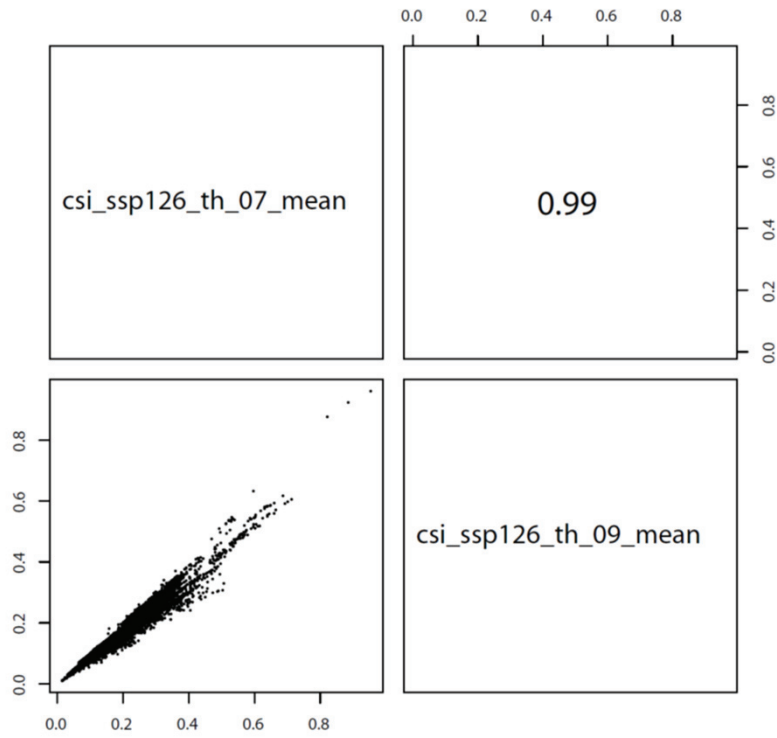

threshold  $r = 0.8$  vs  $r = 0.9$

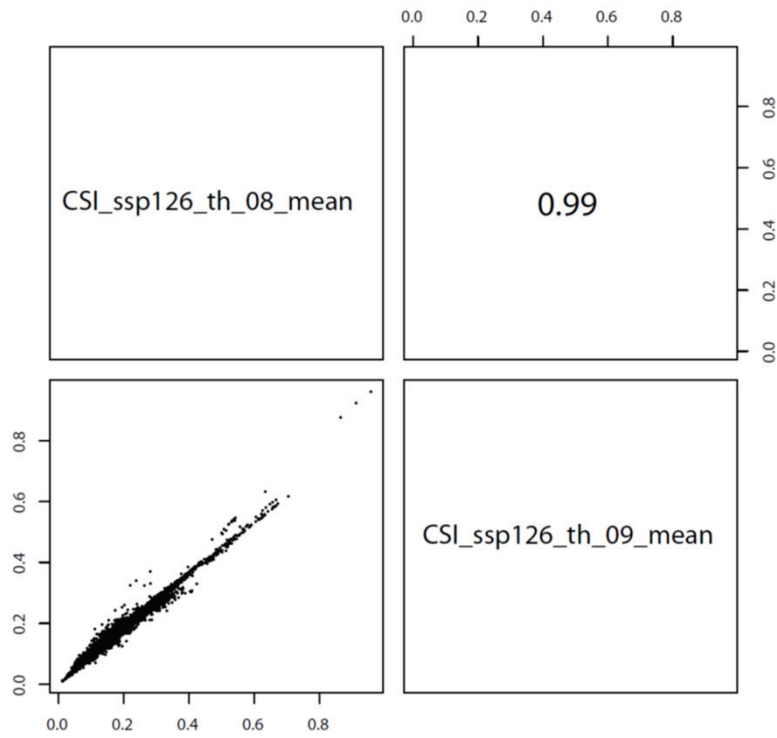

threshold  $r = 0.7$  vs  $r = 0.8$

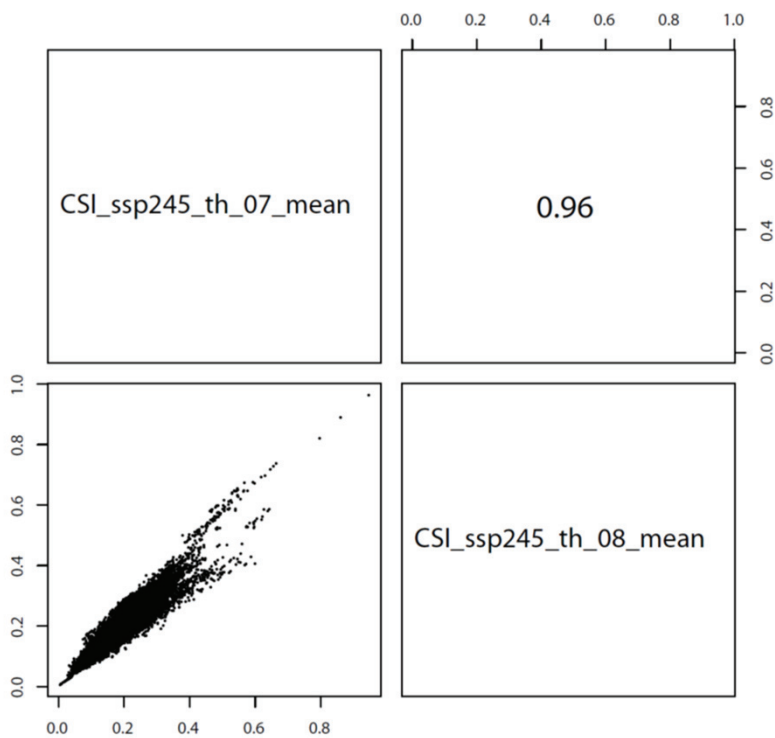

threshold  $r = 0.7$  vs  $r = 0.9$

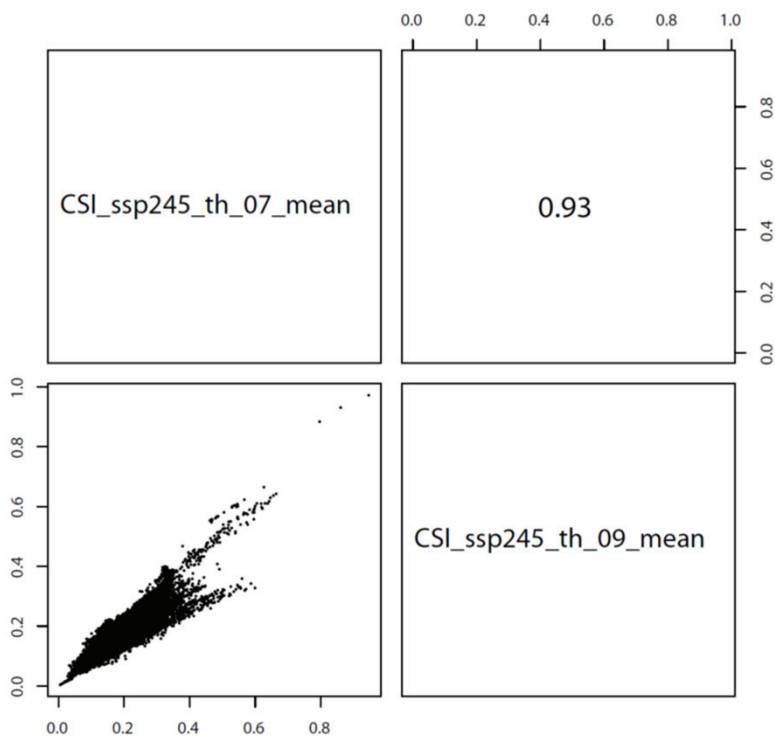

threshold  $r = 0.8$  vs  $r = 0.9$

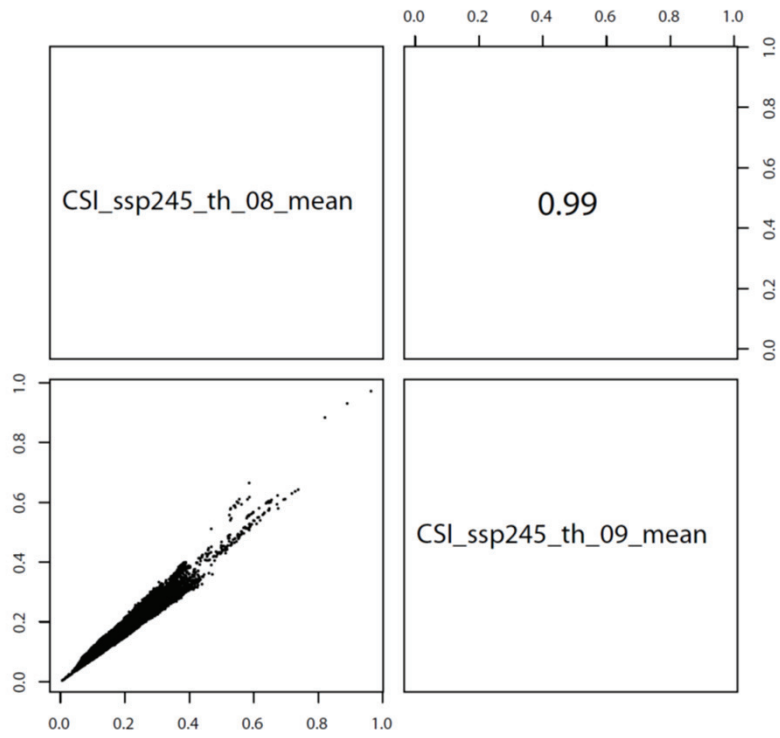

threshold  $r = 0.7$  vs  $r = 0.8$

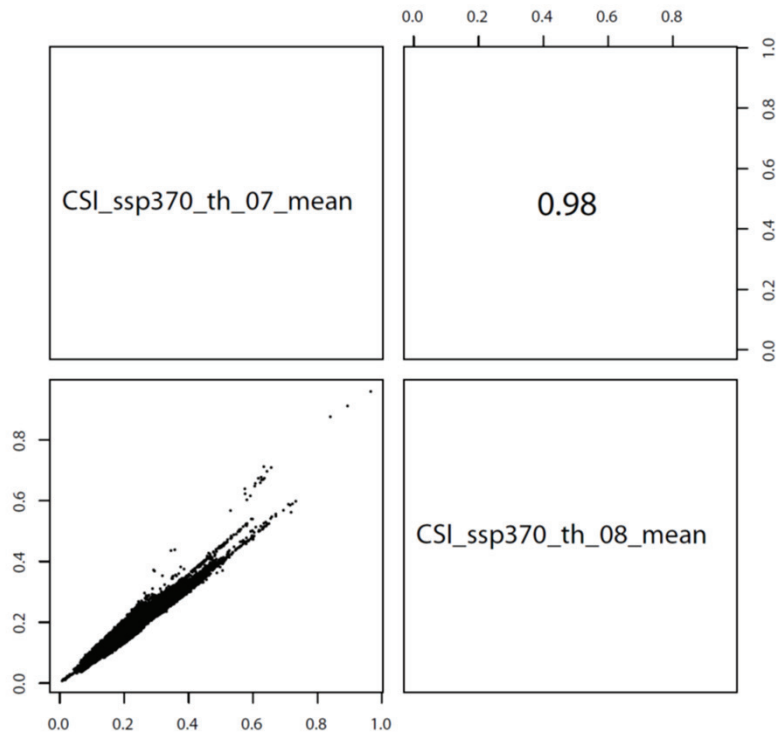



threshold  $r = 0.7$  vs  $r = 0.9$

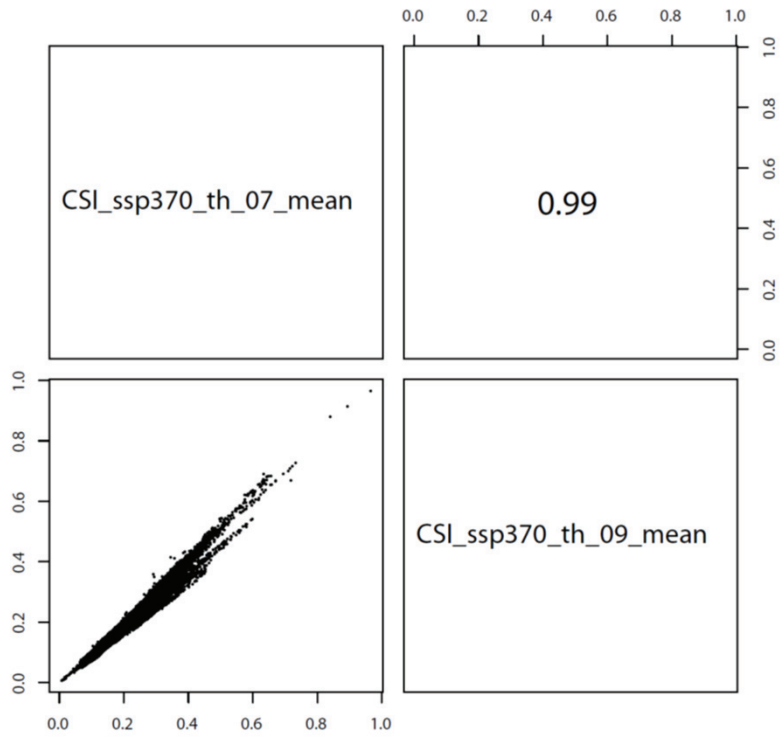

threshold  $r = 0.8$  vs  $r = 0.9$

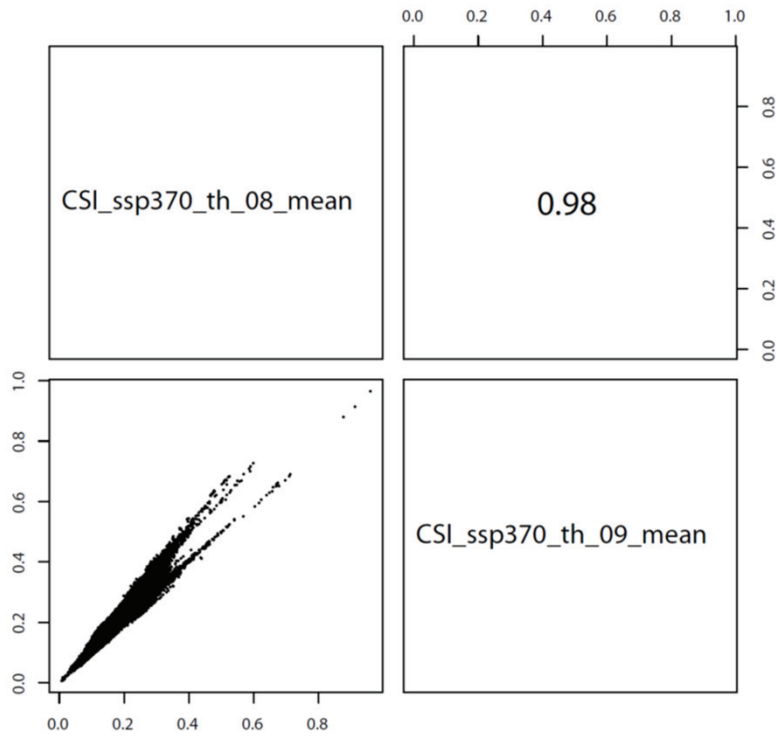

threshold  $r = 0.7$  vs  $r = 0.8$

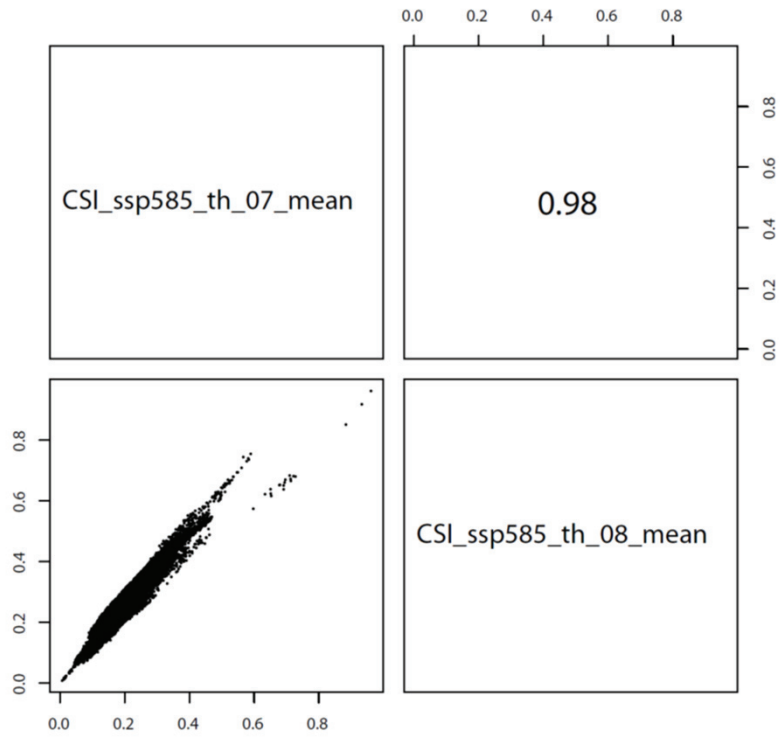

threshold  $r = 0.7$  vs  $r = 0.9$

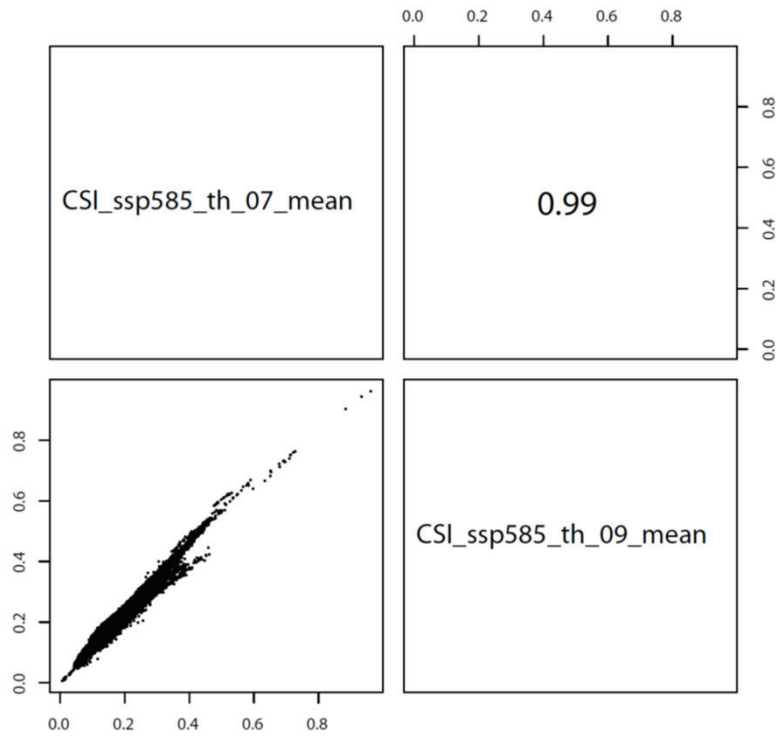

threshold  $r = 0.8$  vs  $r = 0.9$

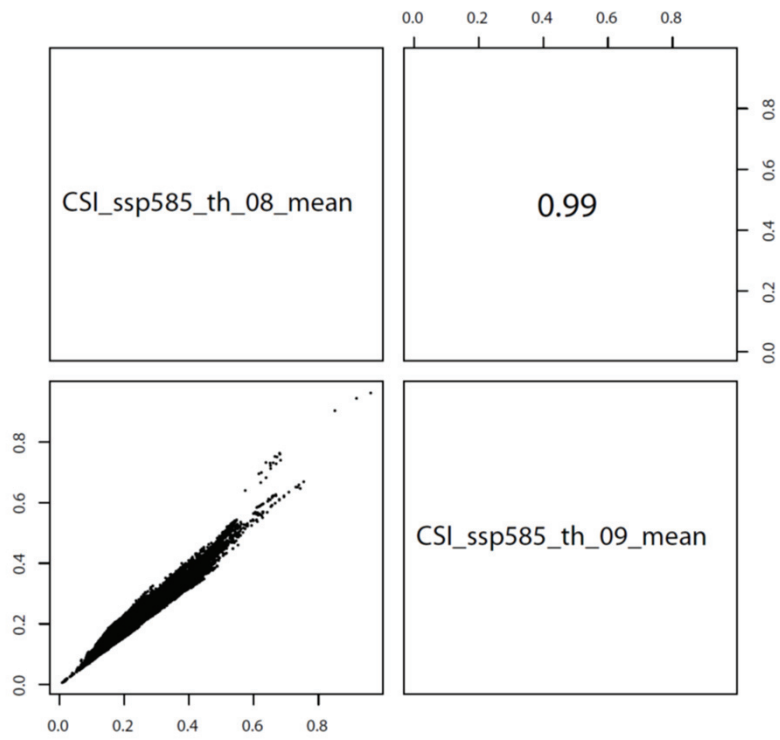

threshold  $r = 0.7$  vs  $r = 0.8$

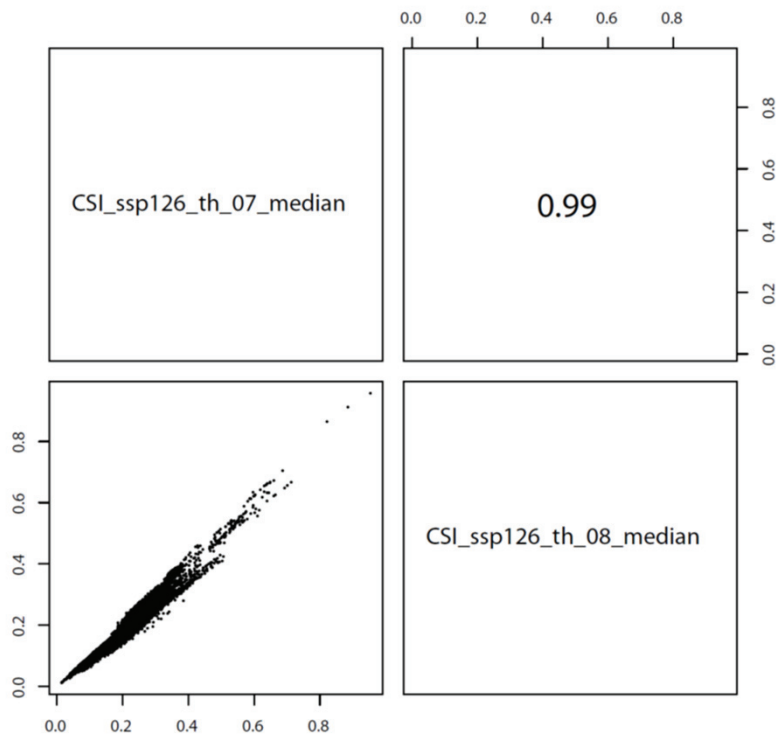

threshold  $r = 0.7$  vs  $r = 0.9$

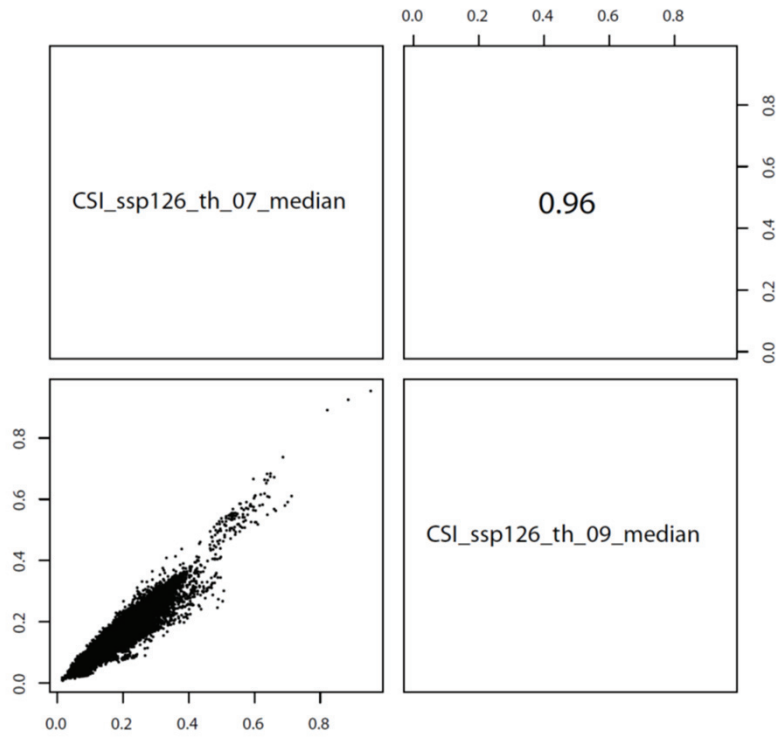

threshold  $r = 0.8$  vs  $r = 0.9$

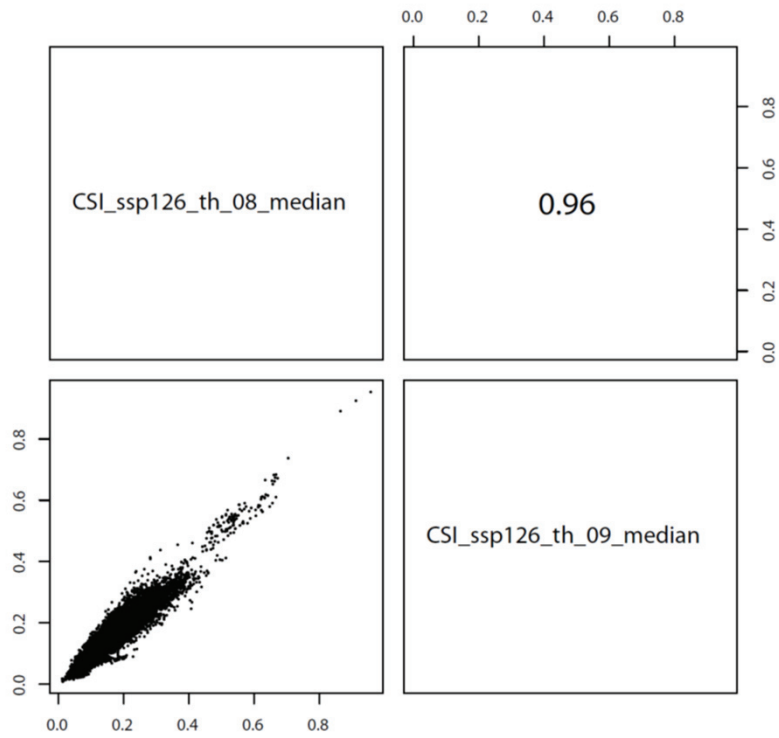

threshold  $r = 0.7$  vs  $r = 0.8$

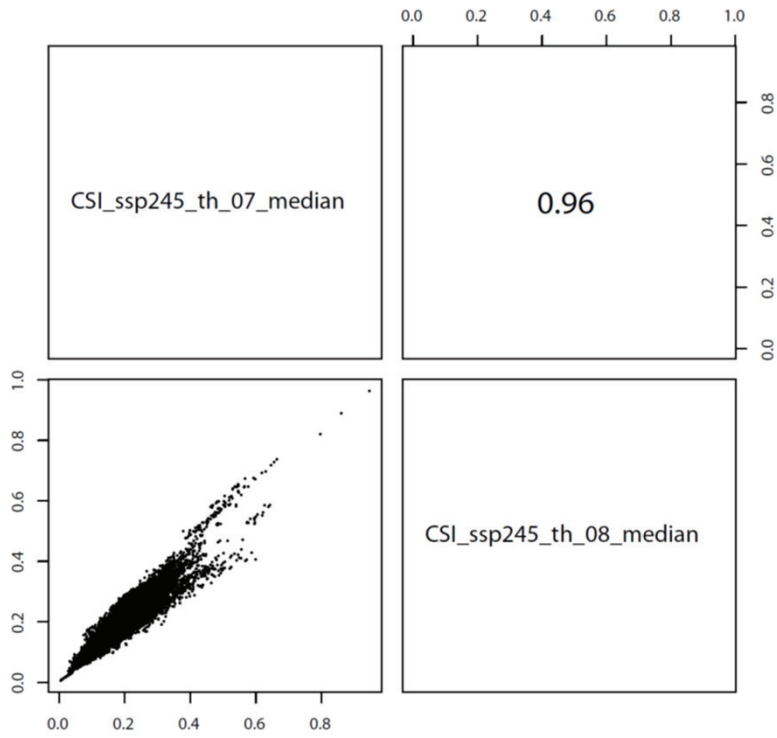

threshold  $r = 0.7$  vs  $r = 0.9$

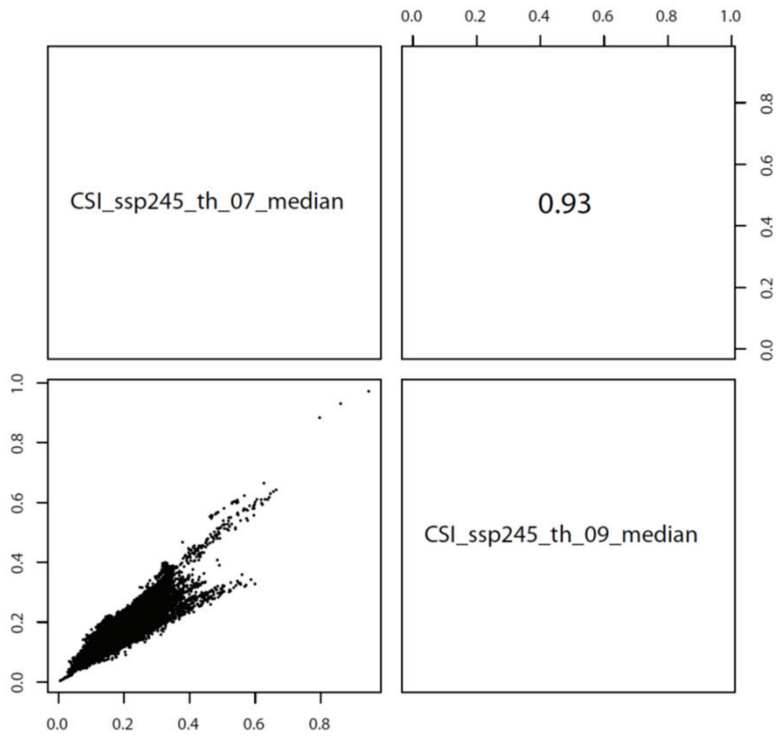

threshold  $r = 0.8$  vs  $r = 0.9$

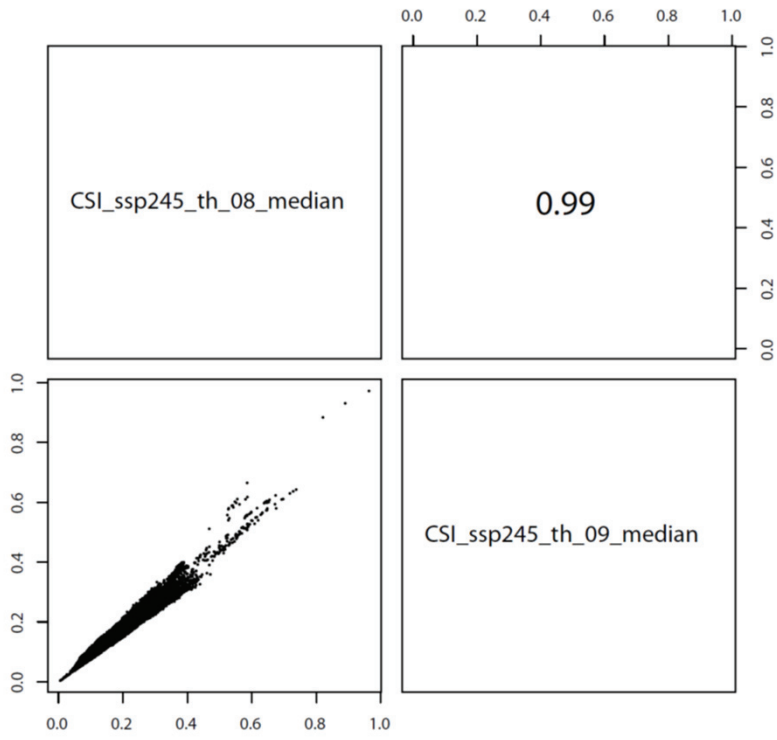

threshold  $r = 0.7$  vs  $r = 0.8$

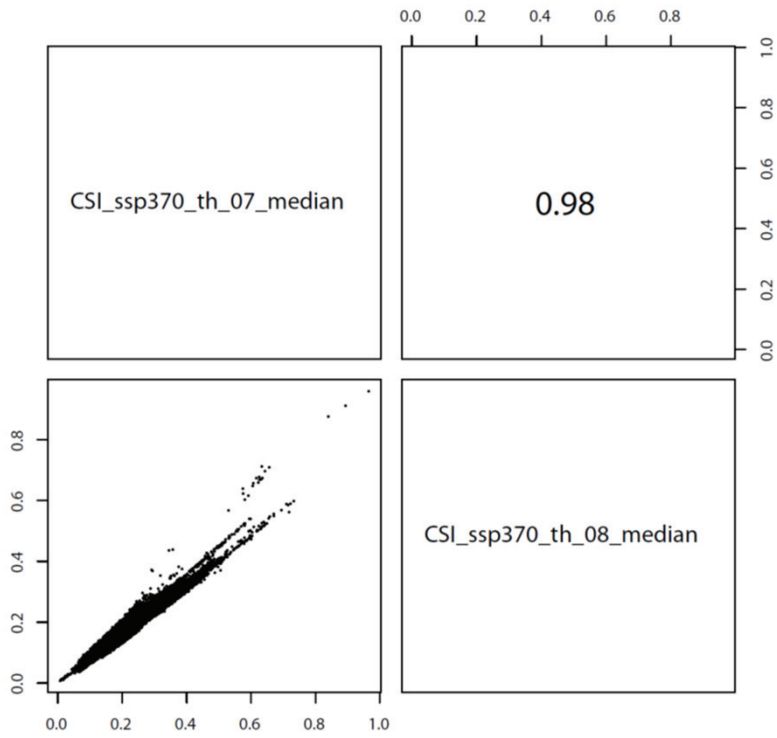

threshold  $r = 0.7$  vs  $r = 0.9$

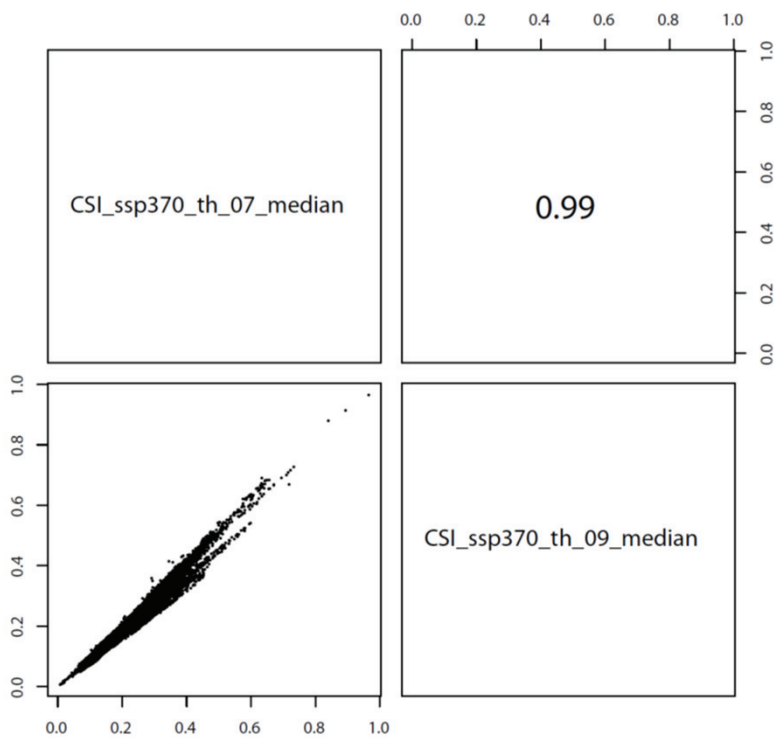

threshold  $r = 0.8$  vs  $r = 0.9$

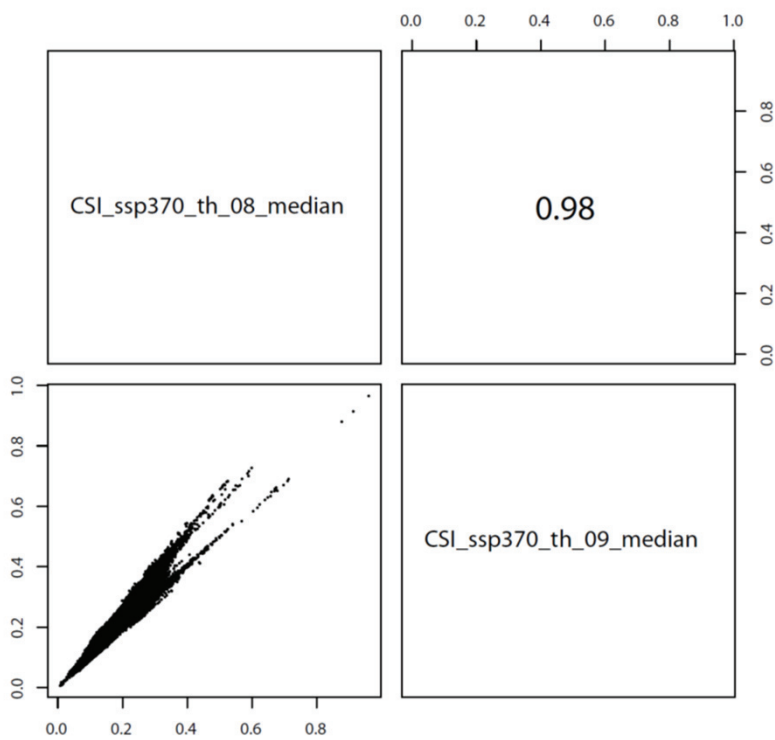

threshold  $r = 0.7$  vs  $r = 0.8$

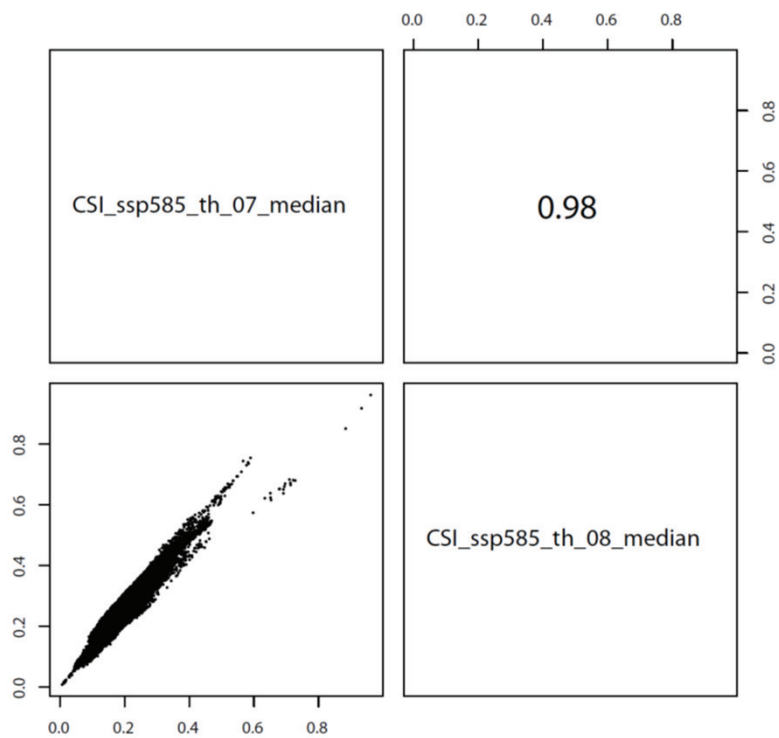

threshold  $r = 0.7$  vs  $r = 0.9$

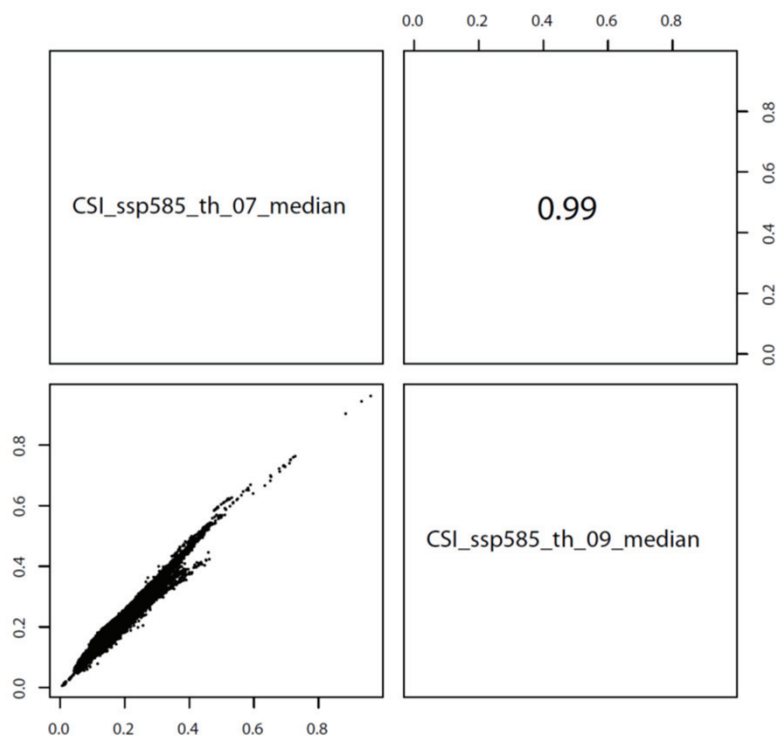



threshold  $r = 0.8$  vs  $r = 0.9$

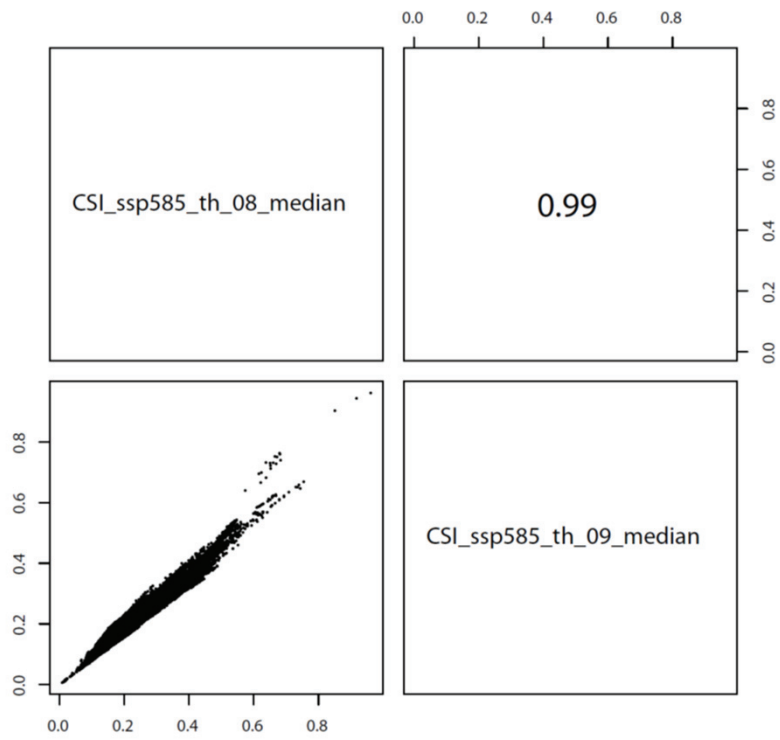

Supplement: 41597_2022_1144_MOESM3_ESM.pdf [file 41597_2022_1144_MOESM3_ESM.pdf]
